# Supplementary material for: Feasibility of Metatranscriptome Analysis from Infant Gut Microbiota: Adaptation to Solid Foods Results in Increased Activity of Firmicutes at Six Months
Source: Hindawi journal article supplement (doi:10.1155/2017/9547063), 2017-01-01
Supplement: f1 [file 9547063.f1.pdf]

401 **Table and Figure Legends**

402 **Supplementary Figure 1.** Log relative abundances of common genera between 2D\_1 and 2D\_2.

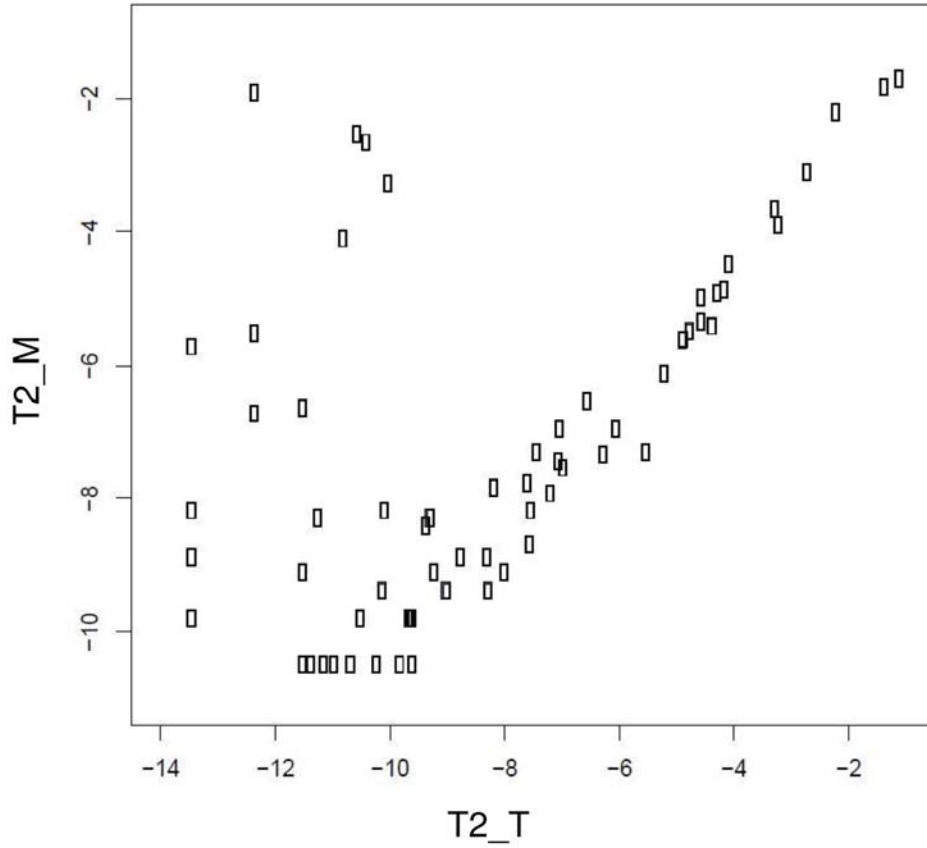

403

404 **Supplementary Figure 2.** Correlations of the expression pattern between the samples.

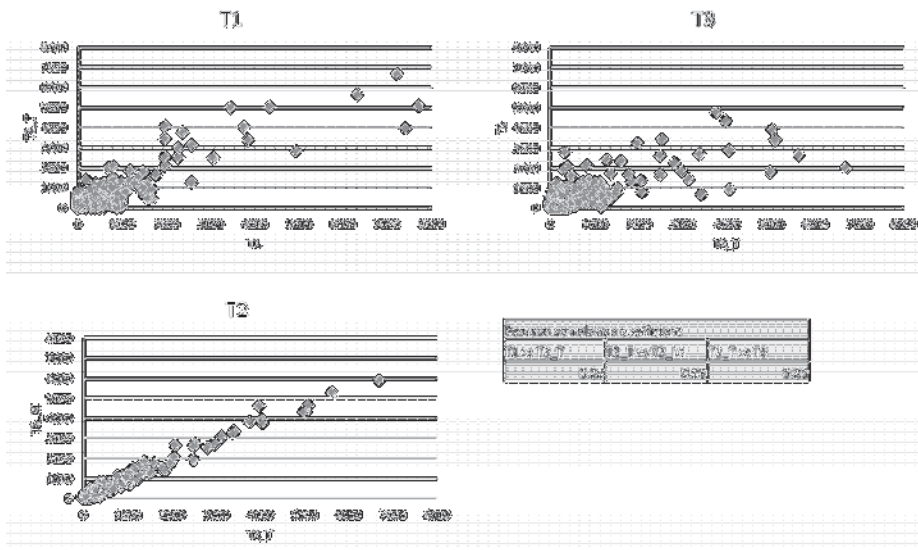

405



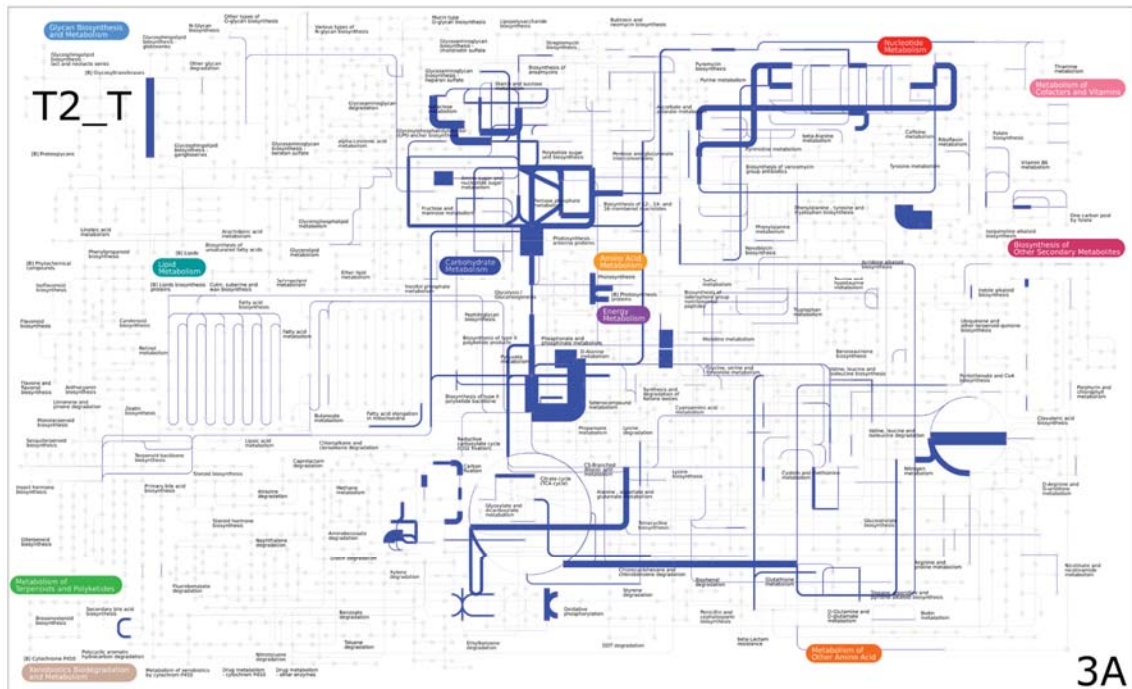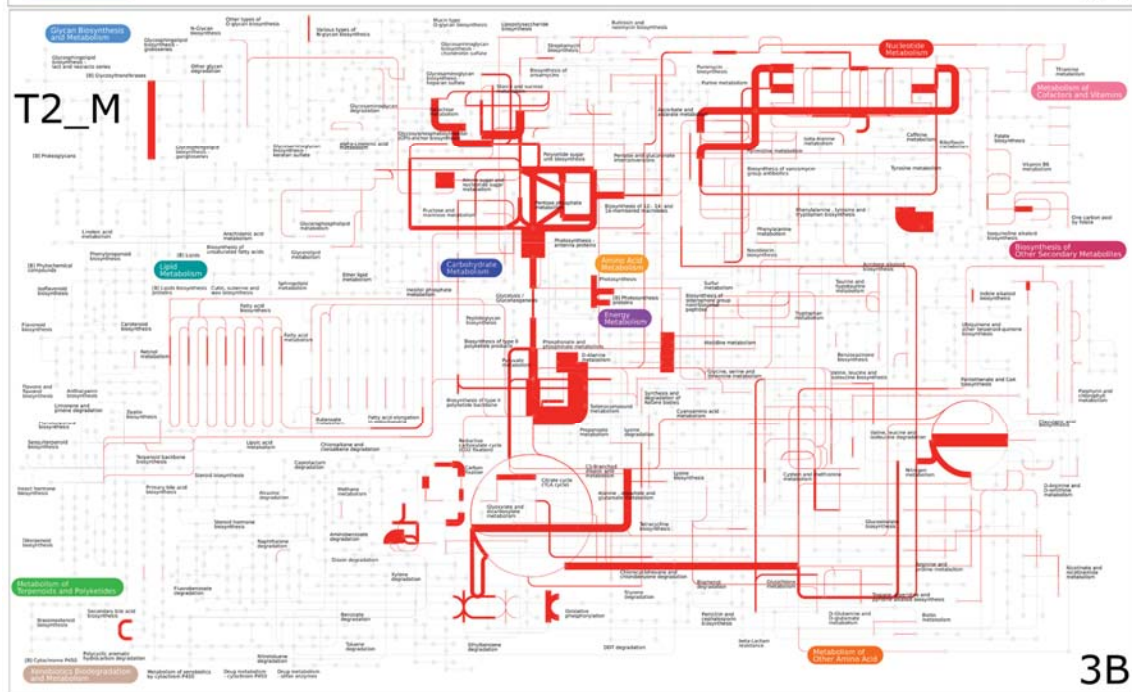

410 **Supplementary Table 1.** List of identified glycosylases in sample T2\_M

|        |                                                          |
|--------|----------------------------------------------------------|
| K01176 | amyA, malS; alpha-amylase;                               |
| K01182 | oligo-1,6-glucosidase;                                   |
| K01186 | NEU1; sialidase-1;                                       |
| K01187 | malZ; alpha-glucosidase;                                 |
| K01190 | lacZ; beta-galactosidase;                                |
| K01191 | alpha-mannosidase;                                       |
| K01192 | MANBA, manB; beta-mannosidase;                           |
| K01193 | sacA; beta-fructofuranosidase;                           |
| K01197 | hya; hyaluronoglucosaminidase;                           |
| K01198 | xynB; xylan 1,4-beta-xylosidase;                         |
| K01200 | pullulanase;                                             |
| K01205 | NAGLU; alpha-N-acetylglucosaminidase;                    |
| K01206 | FUCA; alpha-L-fucosidase;                                |
| K01207 | nagZ; beta-N-acetylhexosaminidase;                       |
| K01209 | abfA; alpha-N-arabinofuranosidase;                       |
| K01210 | glucan 1,3-beta-glucosidase;                             |
| K01215 | dexB; glucan 1,6-alpha-glucosidase;                      |
| K01220 | lacG; 6-phospho-beta-galactosidase;                      |
| K01223 | bglA; 6-phospho-beta-glucosidase;                        |
| K01227 | mannosyl-glycoprotein endo-beta-N-acetylglucosaminidase; |
| K01232 | glvA; maltose-6'-phosphate glucosidase;                  |
| K01234 | npIT; neopullulanase;                                    |
| K01239 | iunH; purine nucleosidase;                               |
| K01240 | URH1; uridine nucleosidase;                              |
| K01243 | mtnN, mtn, pfs; adenosylhomocysteine nucleosidase;       |
| K01246 | tag; DNA-3-methyladenine glycosylase I;                  |
| K01250 | rihA; pyrimidine-specific ribonucleoside hydrolase;      |
| K01811 | yclI; alpha-D-xyloside xylohydrolase;                    |
| K02438 | treX, glgX; glycogen operon protein;                     |
| K03332 | fruA; fructan beta-fructosidase;                         |
| K03575 | mutY; A/G-specific adenine glycosylase;                  |
| K03648 | UNG, UDG; uracil-DNA glycosylase;                        |
| K03660 | OGG1; N-glycosylase/DNA lyase;                           |
| K05349 | bglX; beta-glucosidase;                                  |
| K05520 | pfpl; protease I;                                        |
| K05546 | GANAB; alpha 1,3-glucosidase;                            |
| K06113 | abnA_B; arabinan endo-1,5-alpha-L-arabinosidase;         |
| K07407 | galA, rafA; alpha-galactosidase;                         |
| K08309 | slt; soluble lytic murein transglycosylase;              |
| K12111 | ebgA; evolved beta-galactosidase subunit alpha;          |
| K12308 | bgaB, lacA; beta-galactosidase;                          |
| K12309 | GLB1, ELNR1; beta-galactosidase;                         |
| K12373 | HEXA_B; hexosaminidase;                                  |
| K15532 | yteR, yesR; unsaturated rhamnogalacturonyl hydrolase;    |

NCOAT, MGEA5; protein O-GlcNAcase / histone  
 K15719 acetyltransferase  
 K15921 xynD; arabinoxylan arabinofuranohydrolase;  
 K15923 AXY8, FUC95A, afcA; alpha-L-fucosidase 2

411 **Supplementary Figure 4.** Overall expression of mRNA functions from LGG on the visualization tool  
 412 iPATH2.0.

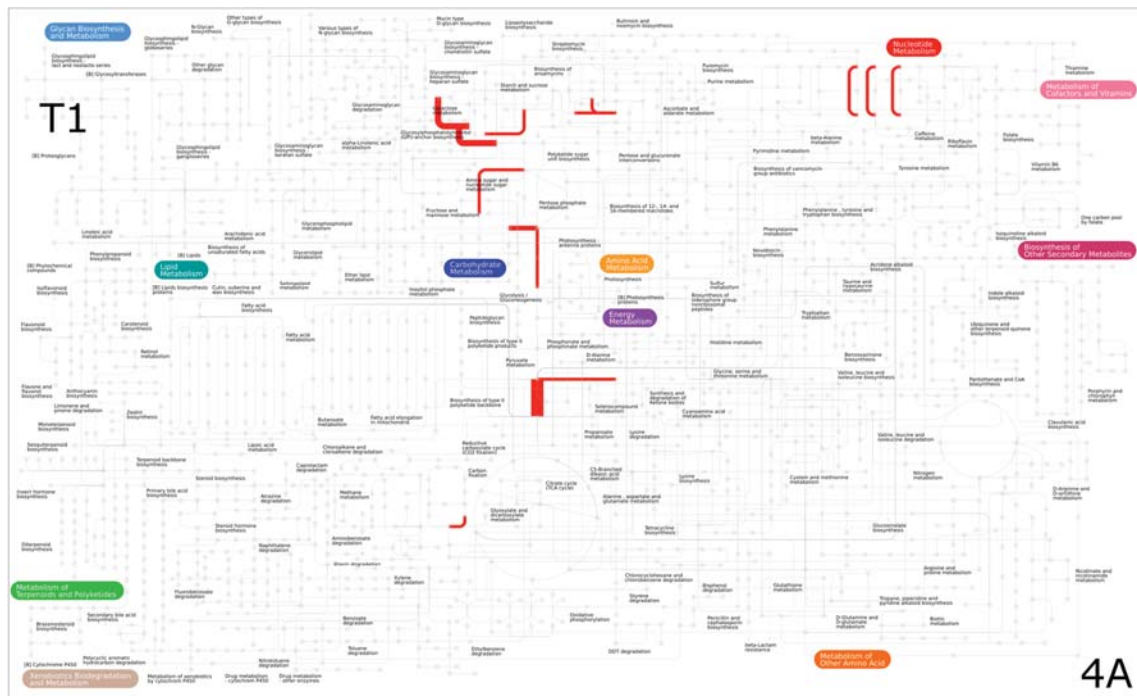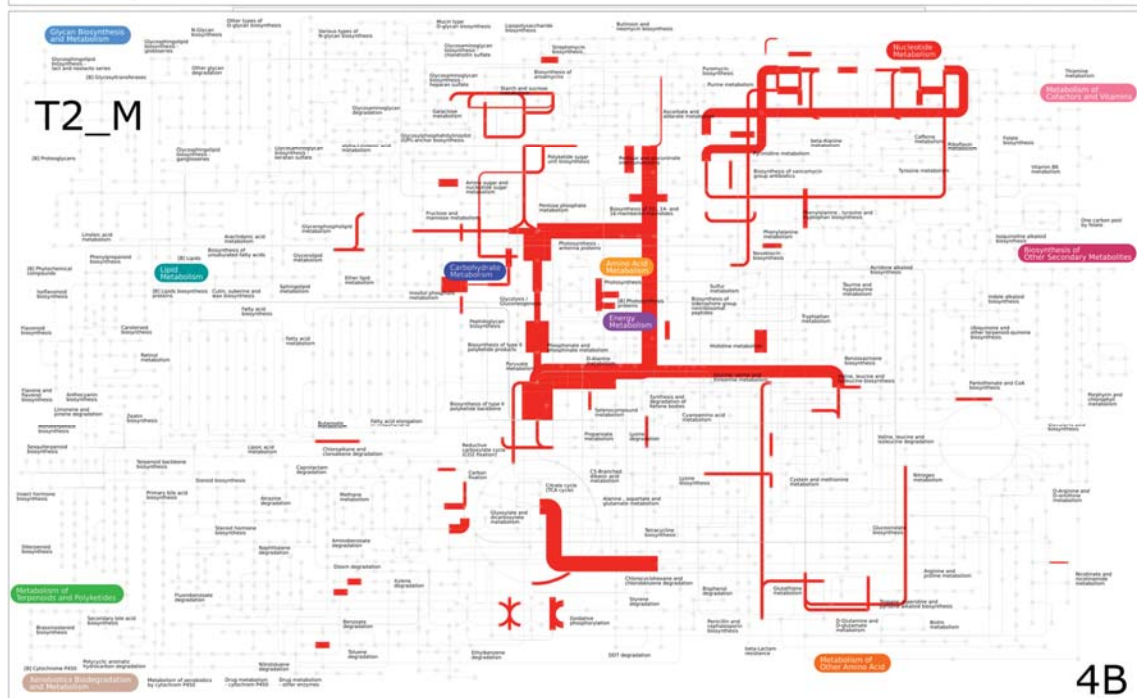

413
